# Supplementary material
Source: PubMed Central journal article supplement (PMC3568931)
Supplement: NIHMS434930-supplement-Appendix_A.pdf [file NIHMS434930-supplement-Appendix_A.pdf]

## Appendix A. Primary Care Physician Task List During a Patient Encounter\*

|                                                                       |
|-----------------------------------------------------------------------|
| 1. Enter room                                                         |
| 2. Gather information from patient                                    |
| 2A. Chief complaint                                                   |
| 2B. Problem information                                               |
| 2C. Patient's current medications                                     |
| 2D. Medications                                                       |
| 2D(1). Side effects                                                   |
| 2D(2). Medication instructions                                        |
| 2D(3). Compliance                                                     |
| 2D(4). Effectiveness                                                  |
| 2D(5). Evidence regarding medication treatment                        |
| 2D(6). Reason for medication                                          |
| 2D(7). Refills needed                                                 |
| 2D(8). Drug interactions                                              |
| 2D(9). Other                                                          |
| 2E. Patient pharmacy                                                  |
| 2F. Cost/access/insurance                                             |
| 2G. Allergies and adverse reactions                                   |
| 2H. Drug/alcohol use                                                  |
| 2I. Tobacco use                                                       |
| 2J. Exercise/diet                                                     |
| 2K. Vitals/weight                                                     |
| 2L. Daily life activities                                             |
| 2M. Support network, living situation, or help in emergency situation |
| 2N. Advanced medical directive/end of life                            |
| 2O. Family history                                                    |
| 2P. Patient home monitoring information                               |
| 2Q. Preventative screening                                            |
| 2R. Test results                                                      |
| 2S. Physical exam                                                     |
| 2T. Diagnosis                                                         |
| 2U. Secondary patient                                                 |
| 2V. Previous appointments with same doctor                            |
| 2W. Review of symptoms/systems (not associated with main problems)    |
| 2W(1). Skin                                                           |
| 2W(2). Neurological                                                   |
| 2W(3). Gastrointestinal                                               |
| 2W(4). Constitutional (fever, weight loss, etc.)                      |
| 2W(5). Eyes                                                           |
| 2W(6). Ears, nose, mouth and throat                                   |
| 2W(7). Cardiovascular                                                 |
| 2W(8). Respiratory                                                    |
| 2W(9). Sleep                                                          |
| 2W(10). Psychiatric                                                   |
| 2W(11). Musculoskeletal/joints/feet                                   |
| 2W(12). Hematological                                                 |
| 2W(13). Sexual/genital/urinary                                        |

|                                                                       |
|-----------------------------------------------------------------------|
| 2X. Social contact                                                    |
| 2Y. "Anything else" question                                          |
| 2Z. Other                                                             |
| 3. Review patient information                                         |
| 3A. Chief complaint                                                   |
| 3B. Problem information                                               |
| 3C. Patient's current medications                                     |
| 3D. Medications                                                       |
| 3E. Patient pharmacy                                                  |
| 3F. Cost/access/insurance                                             |
| 3G. Allergies and adverse reactions                                   |
| 3H. Drug/alcohol use                                                  |
| 3I. Tobacco use                                                       |
| 3J. Exercise/diet                                                     |
| 3K. Vitals/weight                                                     |
| 3L. Daily life activities                                             |
| 3M. Support network, living situation, or help in emergency situation |
| 3N. Advanced medical directive/end of life                            |
| 3O. Family history                                                    |
| 3P. Patient home monitoring information                               |
| 3Q. Preventative screening                                            |
| 3R. Test results                                                      |
| 3S. Physical exam                                                     |
| 3T. Diagnosis                                                         |
| 3U. Secondary patient                                                 |
| 3V. Previous appointments with same doctor                            |
| 3W. Nursing notes/clinic note                                         |
| 3X. Past medical/surgical history/problem list                        |
| 3Y. Outside medical/counseling care                                   |
| 3Y(1). ER/urgent care                                                 |
| 3Y(2). Specialist/other doctors                                       |
| 3Y(3). Hospitalizations                                               |
| 3Z. Follow-up appointment information                                 |
| 3AA. Patient paper forms                                              |
| 3BB. Other                                                            |
| 4. Document patient information                                       |
| 4A. Chief complaint                                                   |
| 4B. Problem information                                               |
| 4C. Patient's current medications                                     |
| 4D. Medications                                                       |
| 4D(1). Side effects                                                   |
| 4D(2). Medication instructions                                        |
| 4D(3). Compliance                                                     |
| 4D(4). Effectiveness                                                  |
| 4D(5). Evidence regarding medication treatment                        |
| 4D(6). Reason for medication                                          |
| 4D(7). Refills needed                                                 |
| 4D(8). Drug interactions                                              |
| 4D(9). Other                                                          |

|                                                                       |
|-----------------------------------------------------------------------|
| 4E. Patient pharmacy                                                  |
| 4F. Cost/access/insurance                                             |
| 4G. Allergies and adverse reactions                                   |
| 4H. Drug/alcohol use                                                  |
| 4I. Tobacco use                                                       |
| 4J. Exercise/diet                                                     |
| 4K. Vitals/weight                                                     |
| 4L. Daily life activities                                             |
| 4M. Support network, living situation, or help in emergency situation |
| 4N. Advanced medical directive/end of life                            |
| 4O. Family history                                                    |
| 4P. Patient home monitoring information                               |
| 4Q. Preventative screening                                            |
| 4R. Test results                                                      |
| 4S. Physical exam                                                     |
| 4T. Diagnosis                                                         |
| 4U. Secondary patient                                                 |
| 4V. Treatment plan                                                    |
| 4W. Review of symptoms/systems (not associated with main problems)    |
| 4W(1). Skin                                                           |
| 4W(2). Neurological                                                   |
| 4W(3). Gastrointestinal                                               |
| 4W(4). Constitutional (fever, weight loss, etc.)                      |
| 4W(5). Eyes                                                           |
| 4W(6). Ears, nose, mouth and throat                                   |
| 4W(7). Cardiovascular                                                 |
| 4W(8). Respiratory                                                    |
| 4W(9). Sleep                                                          |
| 4W(10). Psychiatric                                                   |
| 4W(11). Musculoskeletal/joints/feet                                   |
| 4W(12). Hematological                                                 |
| 4W(13). Sexual/genital/urinary                                        |
| 4X. Past medical/surgical history/problem list                        |
| 4Y. Outside medical/counseling care                                   |
| 4Y(1). ER/urgent care                                                 |
| 4Y(2). Specialist/other doctors                                       |
| 4Y(3). Hospitalizations                                               |
| 4Z. Follow-up appointment information                                 |
| 4AA. Other                                                            |
| 5. Perform                                                            |
| 5A. Procedure                                                         |
| 5B. Vitals                                                            |
| 5C. Physical exam                                                     |
| 5D. Hand sanitization                                                 |
| 5E. Immunization                                                      |
| 5F. Fill out patient form                                             |
| 5G. Dictate                                                           |
| 5H. Telephone call/answer phone/pager                                 |
| 5I. Calculation                                                       |

|                                               |
|-----------------------------------------------|
| 5I(1). BMI                                    |
| 5I(2). Medication dosage                      |
| 5J. Login to computer/EHR                     |
| 5K. Open template                             |
| 5L. Other                                     |
| 6. Recommend/discuss treatment options        |
| 6A. Medication                                |
| 6B. Diet/exercise                             |
| 6C. Test/preventive screening                 |
| 6D. Procedure                                 |
| 6E. Follow-up appointment                     |
| 6F. Referral to specialist                    |
| 6G. Home remedy                               |
| 6H. Non-traditional treatment                 |
| 6I. Observation/wait and see/do nothing       |
| 6J. Immunization                              |
| 6K. Home monitoring                           |
| 6L. Get additional information                |
| 6M. Other                                     |
| 7. Look up                                    |
| 7A. Treatment information                     |
| 7B. Referral doctor                           |
| 7C. Drug information                          |
| 7D. Other                                     |
| 8. Order                                      |
| 8A. Medication                                |
| 8B. Test                                      |
| 8C. Referral to specialist                    |
| 8D. Procedure                                 |
| 8E. Immunization                              |
| 8F. Other                                     |
| 9. Communicate                                |
| 9A. Nurse                                     |
| 9B. Other healthcare provider                 |
| 10. Print/give patient (advice, instructions) |
| 10A. Paper prescription                       |
| 10B. Medication information/instructions      |
| 10C. Test order form                          |
| 10D. Sample medication                        |
| 10E. Disease/problem information              |
| 10F. Home monitoring card/paper               |
| 10G. Medical equipment                        |
| 10H. Follow-up appointment information        |
| 10I. Appointment summary                      |
| 10J. Referral information                     |
| 10K. Other                                    |
| 11. Appointment wrap-up                       |
| 11A. Walk patient                             |
| 11A(1). Nurse station                         |

|                                   |
|-----------------------------------|
| 11A(2). Waiting room              |
| 11A(3). Labs                      |
| 11A(4). Radiology                 |
| 11A(5). Reception                 |
| 11B. Go to (appointment not over) |
| 11B(1). Office                    |
| 11B(2). Nurse station             |
| 11B(3). Waiting room              |
| 11B(4). Labs                      |
| 11B(5). Radiology                 |
| 11B(6). Reception                 |
| 11B(7). Sample medication cabinet |
| 11B(8). Another patient           |
| 11B(9). Other                     |
| 11C. Log out of computer/EHR      |
| 12. Leave room                    |
